# Supplementary material for: Maullinia braseltonii sp. nov. (Rhizaria, Phytomyxea, Phagomyxida): A Cyst-forming Parasite of the Bull Kelp Durvillaea spp. (Stramenopila, Phaeophyceae, Fucales)
Source: PubMed Central journal article supplement (PMC5673062; doi:10.1016/j.protis.2017.07.001), 2017-07-13
Supplement: NIHMS73520-supplement-Appendix_A.pdf [file NIHMS73520-supplement-Appendix_A.pdf]

## Supplementary Information

### ***Maullinia braseltonii* sp. nov. (Rhizaria, Phytomyxea, Phagomyxida): A cyst-forming parasite of the bull kelp *Durvillaea* spp. (Stramenopila, Phaeophyceae, Fucales)**

Pedro Murúa<sup>1,2,3</sup>, Franz Goecke<sup>4</sup>, Renato Westermeier<sup>3</sup>, Pieter van West<sup>2</sup>,  
Frithjof C. Küpper<sup>1</sup>, Sigrid Neuhauser<sup>5</sup>.

Index of Items:

|                                                                                                                                     |       |
|-------------------------------------------------------------------------------------------------------------------------------------|-------|
| <b>Supplementary Figure 1.</b> Geographic origin of samples.                                                                        | p2    |
| <b>Supplementary Figure 2:</b> 18S-rDNA PhyML tree supplementing Fig. 5.                                                            | p3    |
| <b>Supplementary Figure 3:</b> 18S-rDNA RAxML tree supplementing Fig. 5.                                                            | p4    |
| <b>Supplementary Figure 4:</b> Partial-18S-5.8S-partial-28S rDNA RAxML tree supplementing Fig. 6.                                   | p5    |
| <b>Supplementary Table 1:</b> Size of the galls caused by <i>M. braseltonii</i> on the fronds of <i>D. antarctica</i> in Mar Brava. | p6    |
| <b>Supplementary Table 2:</b> Size of plasmodia formed by <i>M. braseltonii</i> .                                                   | p7-8  |
| <b>Supplementary Table 3:</b> Size of resting spores formed by <i>M. braseltonii</i> .                                              | p9-10 |

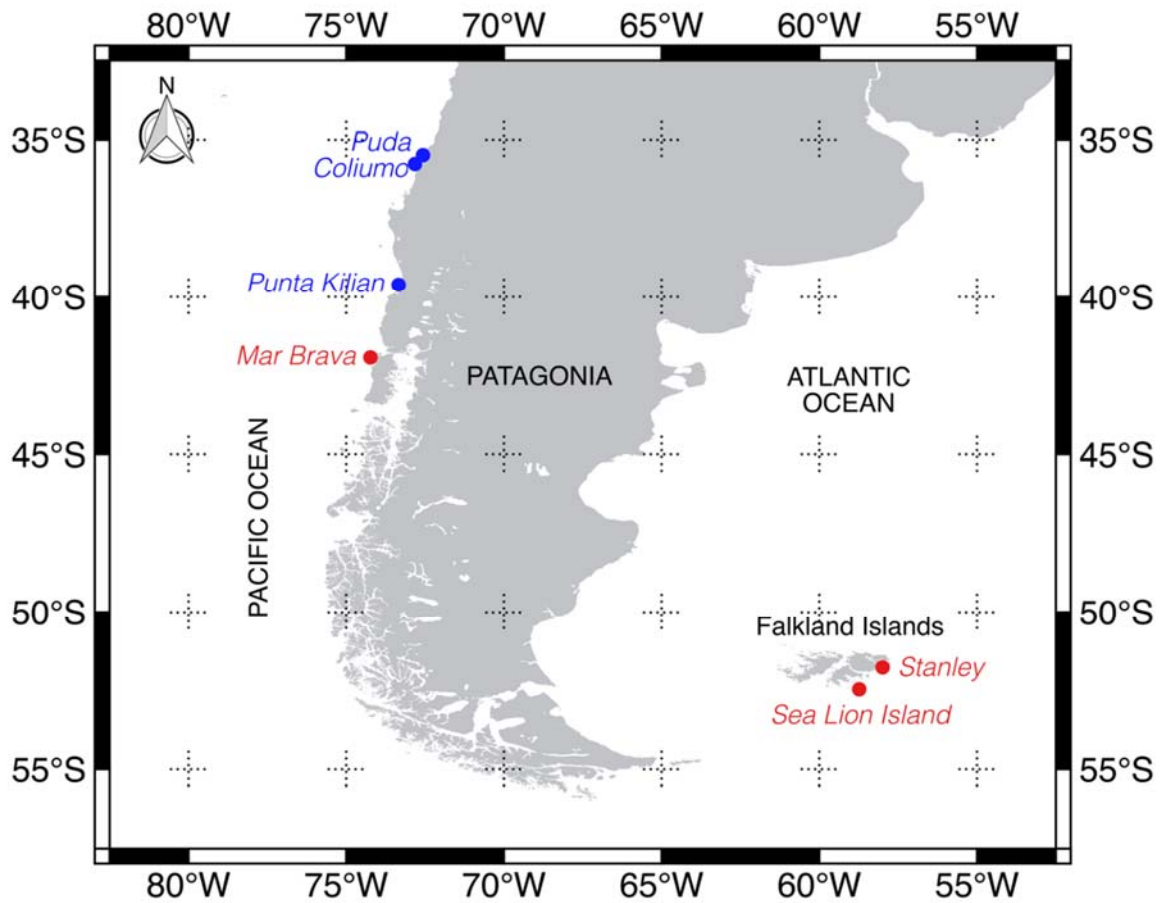

**Supplementary Figure 1.** Geographic origin of samples. Localities in the South-eastern Pacific and the Atlantic where our biological material and/or sequences came from (red dots), which constitute new records for *Maullinia braseltonii*. Old records of the species are indicated with blue dots.

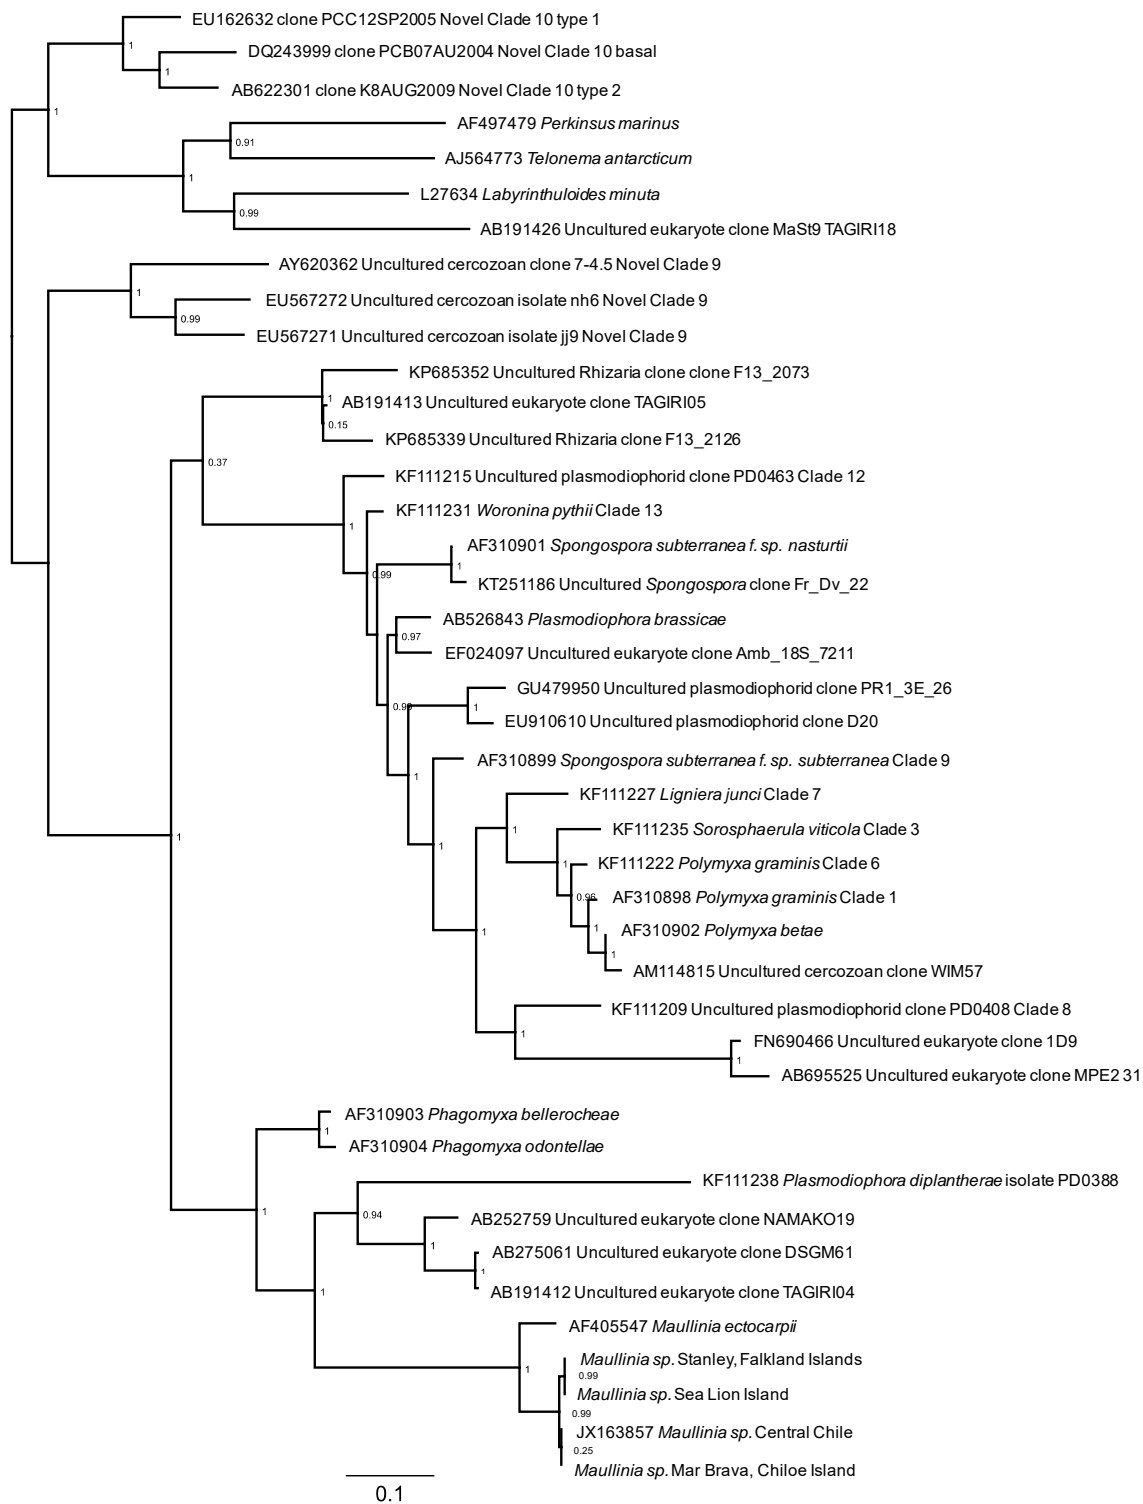

**Supplementary Figure 2:** 18S-rDNA PhyML tree supplementing Fig. 5. 43 sequences and 1002 positions. Model used was JC 69 with searching for Best of NNIs and SPRs.  $\chi^2$  support values are given. All major branches are well supported and the separation into *M. ectocarpii* and *M. braseltonii* has a high support value.

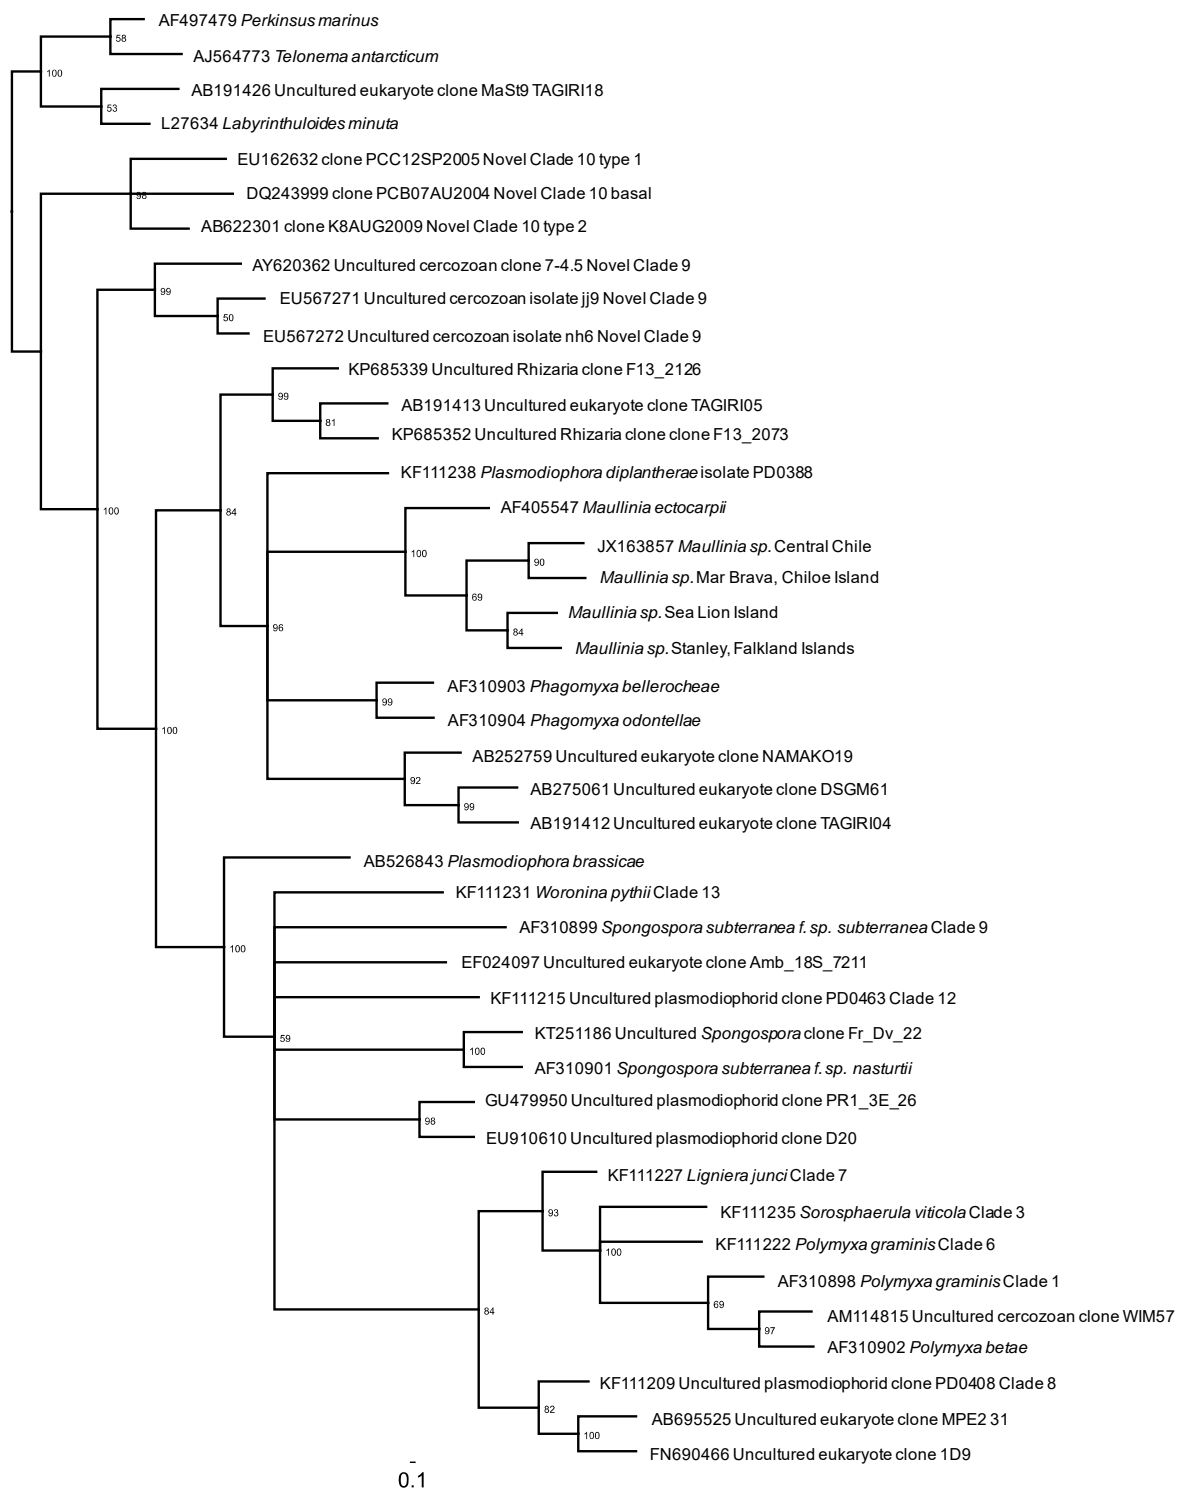

**Supplementary Figure 3:** 18S-rDNA RAxML tree supplementing Fig. 5. 43 sequences and 1002 positions. Tree was generated using the GTR Gamma I model with 100 rapid bootstrapping replicates. The displayed consensus tree was generated with using the Consensus tree builder implemented in Geneious using a support threshold of 50% and a burn in of 10% of the trees. Support for the *M. braseltonii* branch is rather low with a bootstrap value of 69, however, the support values for two clades within *M. braseltonii* is high compared to the PhyML and MrBayes trees, explain the low support of the main branch of the species.

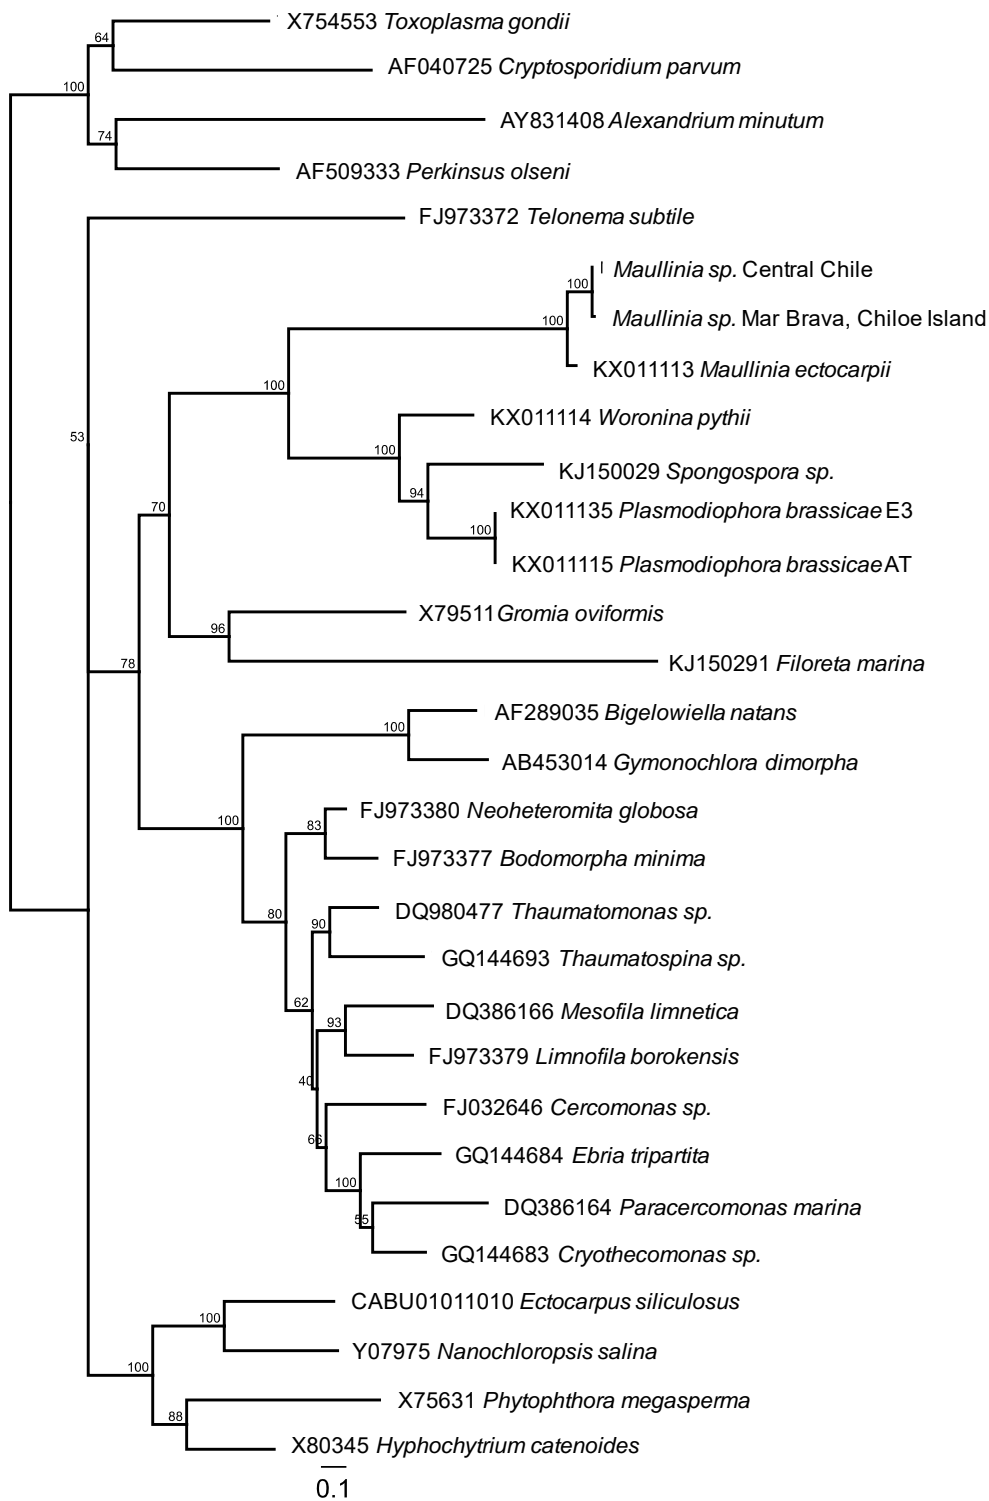

**Supplementary Figure 4:** partial-18S-5.8S-partial-28S rDNA RAxML tree supplementing Fig. 6. 30 sequences and 1767 positions (ITS1, ITS2 were excluded from the analyses). Tree was generated using GTR+CAT+I with 100 bootstrap replicates and a search for the best scoring ML tree.

**Supplementary Table 1:** Size of the galls caused by *M. braseltonii* on the fronds of *D. antarctica* in Mar Brava (n=38). Galls were measured *in situ* using a regular Vernier caliper. A specimen number was assigned to each analysed frond and all galls on each individual were measured across the two broadest planes.

| Gall size (cm) |        |       |          |         |       |      |
|----------------|--------|-------|----------|---------|-------|------|
| Specimen       | Length | Width | Specimen | Length  | Width |      |
| 1              | 5.3    | 2     | 3        | 5.2     | 3.8   |      |
| 1              | 2.3    | 2     | 4        | 9.7     | 6.7   |      |
| 1              | 2.2    | 1.8   | 4        | 8.2     | 6.1   |      |
| 1              | 1.9    | 0.9   | 5        | 3.3     | 3.5   |      |
| 1              | 1.8    | 1.6   | 5        | 1.9     | 1.8   |      |
| 1              | 2.1    | 1.9   | 6        | 9.1     | 5.3   |      |
| 1              | 2.1    | 1     | 6        | 7.2     | 5.3   |      |
| 1              | 2      | 1.7   | 6        | 4.1     | 3.1   |      |
| 1              | 2      | 1.9   | 6        | 8.8     | 5.9   |      |
| 1              | 2.2    | 1     | 6        | 3.1     | 2     |      |
| 1              | 2      | 1.1   | 6        | 5.2     | 4.1   |      |
| 1              | 0.9    | 0.9   | 6        | 5.5     | 5     |      |
| 1              | 1.9    | 1.9   | 6        | 8       | 6.5   |      |
| 1              | 3.9    | 2.8   | 6        | 6.1     | 3.3   |      |
| 1              | 2.2    | 1     | 6        | 5.4     | 5.1   |      |
| 1              | 2.3    | 1.1   | 6        | 6.9     | 5     |      |
| 2              | 8.5    | 4.9   | 6        | 8.4     | 5.2   |      |
| 2              | 7.4    | 4.1   | 7        | 3.9     | 3.7   |      |
| 3              | 7.2    | 5.9   | 8        | 4.3     | 3.4   |      |
|                |        |       |          | Median  | 4     | 3.2  |
|                |        |       |          | Average | 4.59  | 3.27 |
|                |        |       |          | Max     | 9.7   | 6.7  |
|                |        |       |          | Min     | 0.9   | 0.9  |

**Supplementary Table 2:** Size of the plasmodia formed by *M. braseltonii* (n= 120). Plasmodium dimensions were calculated *in silico* from microscopic images (Axiocam HRc), using the image analysis software FIJI.

| Plasmodia size (um) |       |             |        |       |             |
|---------------------|-------|-------------|--------|-------|-------------|
| Length              | Width | Ratio       | Length | Width | Ratio       |
| 44                  | 37    | 1.189189189 | 82     | 49    | 1.673469388 |
| 68                  | 61    | 1.114754098 | 119    | 71    | 1.676056338 |
| 49                  | 45    | 1.088888889 | 52     | 31    | 1.677419355 |
| 34                  | 33    | 1.03030303  | 59     | 35    | 1.685714286 |
| 44                  | 43    | 1.023255814 | 71     | 42    | 1.69047619  |
| 35                  | 35    | 1           | 73     | 43    | 1.697674419 |
| 27                  | 27    | 1           | 67     | 39    | 1.717948718 |
| 39                  | 38    | 1.026315789 | 45     | 26    | 1.730769231 |
| 38                  | 37    | 1.027027027 | 66     | 38    | 1.736842105 |
| 40                  | 38    | 1.052631579 | 91     | 52    | 1.75        |
| 32                  | 30    | 1.066666667 | 69     | 39    | 1.769230769 |
| 78                  | 73    | 1.068493151 | 55     | 31    | 1.774193548 |
| 47                  | 42    | 1.119047619 | 73     | 41    | 1.780487805 |
| 59                  | 52    | 1.134615385 | 67     | 37    | 1.810810811 |
| 56                  | 49    | 1.142857143 | 42     | 23    | 1.826086957 |
| 50                  | 43    | 1.162790698 | 66     | 36    | 1.833333333 |
| 43                  | 36    | 1.194444444 | 72     | 39    | 1.846153846 |
| 47                  | 39    | 1.205128205 | 76     | 41    | 1.853658537 |
| 56                  | 46    | 1.217391304 | 71     | 38    | 1.868421053 |
| 50                  | 41    | 1.219512195 | 64     | 34    | 1.882352941 |
| 42                  | 34    | 1.235294118 | 64     | 34    | 1.882352941 |
| 78                  | 63    | 1.238095238 | 81     | 43    | 1.88372093  |
| 57                  | 46    | 1.239130435 | 61     | 32    | 1.90625     |
| 64                  | 51    | 1.254901961 | 46     | 24    | 1.916666667 |
| 44                  | 35    | 1.257142857 | 71     | 37    | 1.918918919 |
| 57                  | 45    | 1.266666667 | 81     | 42    | 1.928571429 |
| 54                  | 42    | 1.285714286 | 81     | 42    | 1.928571429 |
| 63                  | 49    | 1.285714286 | 60     | 31    | 1.935483871 |
| 44                  | 34    | 1.294117647 | 66     | 34    | 1.941176471 |
| 66                  | 51    | 1.294117647 | 68     | 35    | 1.942857143 |
| 60                  | 45    | 1.333333333 | 43     | 22    | 1.954545455 |
| 53                  | 39    | 1.358974359 | 43     | 22    | 1.954545455 |
| 34                  | 25    | 1.36        | 45     | 23    | 1.956521739 |
| 44                  | 32    | 1.375       | 60     | 30    | 2           |
| 72                  | 52    | 1.384615385 | 66     | 33    | 2           |
| 60                  | 43    | 1.395348837 | 75     | 37    | 2.027027027 |
| 28                  | 20    | 1.4         | 53     | 26    | 2.038461538 |
| 56                  | 40    | 1.4         | 64     | 31    | 2.064516129 |
| 35                  | 25    | 1.4         | 58     | 28    | 2.071428571 |
| 62                  | 44    | 1.409090909 | 73     | 35    | 2.085714286 |
| 62                  | 44    | 1.409090909 | 57     | 27    | 2.111111111 |
| 58                  | 40    | 1.45        | 49     | 23    | 2.130434783 |
| 41                  | 28    | 1.464285714 | 54     | 25    | 2.16        |

| Plasmodia size (um) |                    |             |        |       |             |
|---------------------|--------------------|-------------|--------|-------|-------------|
| Length              | Width              | Ratio       | Length | Width | Ratio       |
| 79                  | 53                 | 1.490566038 | 54     | 25    | 2.16        |
| 90                  | 60                 | 1.5         | 67     | 30    | 2.233333333 |
| 66                  | 44                 | 1.5         | 65     | 29    | 2.24137931  |
| 65                  | 43                 | 1.511627907 | 48     | 21    | 2.285714286 |
| 47                  | 31                 | 1.516129032 | 87     | 38    | 2.289473684 |
| 61                  | 40                 | 1.525       | 63     | 27    | 2.333333333 |
| 46                  | 30                 | 1.533333333 | 97     | 41    | 2.365853659 |
| 54                  | 35                 | 1.542857143 | 95     | 40    | 2.375       |
| 65                  | 42                 | 1.547619048 | 88     | 37    | 2.378378378 |
| 48                  | 31                 | 1.548387097 | 70     | 29    | 2.413793103 |
| 85                  | 54                 | 1.574074074 | 77     | 31    | 2.483870968 |
| 80                  | 50                 | 1.6         | 72     | 26    | 2.769230769 |
| 54                  | 33                 | 1.636363636 | 55     | 18    | 3.055555556 |
| 54                  | 33                 | 1.636363636 | 83     | 25    | 3.32        |
| 64                  | 39                 | 1.641025641 | 84     | 24    | 3.5         |
| 87                  | 53                 | 1.641509434 | 104    | 28    | 3.714285714 |
| 90                  | 54                 | 1.666666667 | 109    | 28    | 3.892857143 |
|                     | Median             |             | 61     | 37    | 1.67        |
|                     | Average            |             | 61.85  | 37.46 | 1.72        |
|                     | Standard deviation |             | 17.18  | 10.29 | 0.54        |
|                     | Max                |             | 119    | 73    | 3.89        |
|                     | Min                |             | 27     | 18    | 1           |



**Supplementary Table 3:** Size of resting spores formed by *M. braseltonii* (n= 110). Resting spore dimensions were calculated *in silico* from microscopic images (Axiocam HRc), using the image analysis software FIJI.

| Spore size (um) |       |             |        |       |             |
|-----------------|-------|-------------|--------|-------|-------------|
| Length          | Width | Ratio       | Length | Width | Ratio       |
| 3.592           | 2.395 | 1.499791232 | 3.172  | 2.695 | 1.176994434 |
| 3.464           | 2.322 | 1.491817399 | 3.077  | 2.615 | 1.17667304  |
| 3.355           | 2.283 | 1.4695576   | 3.105  | 2.643 | 1.174801362 |
| 3.205           | 2.183 | 1.468163078 | 3.243  | 2.762 | 1.174149167 |
| 3.365           | 2.293 | 1.467509812 | 2.577  | 2.195 | 1.174031891 |
| 3.452           | 2.364 | 1.460236887 | 2.741  | 2.357 | 1.162918965 |
| 3.562           | 2.466 | 1.444444444 | 2.832  | 2.436 | 1.162561576 |
| 3.385           | 2.357 | 1.436147645 | 2.695  | 2.322 | 1.160637382 |
| 3.205           | 2.239 | 1.431442608 | 2.695  | 2.322 | 1.160637382 |
| 3.631           | 2.538 | 1.430654058 | 3.172  | 2.741 | 1.157241883 |
| 3.649           | 2.554 | 1.428739233 | 3.421  | 2.96  | 1.155743243 |
| 3.122           | 2.195 | 1.422323462 | 2.812  | 2.439 | 1.152931529 |
| 3.387           | 2.409 | 1.405977584 | 3.824  | 3.327 | 1.149383829 |
| 2.982           | 2.122 | 1.40527804  | 3.462  | 3.039 | 1.139190523 |
| 2.952           | 2.114 | 1.39640492  | 3.276  | 2.881 | 1.137105172 |
| 3.471           | 2.489 | 1.394535958 | 3.001  | 2.643 | 1.135452138 |
| 3.527           | 2.545 | 1.385854617 | 3.427  | 3.039 | 1.127673577 |
| 3.452           | 2.564 | 1.346333853 | 3.046  | 2.717 | 1.121089437 |
| 3.328           | 2.529 | 1.315935152 | 3.343  | 2.982 | 1.121059691 |
| 3.215           | 2.449 | 1.312780727 | 3.309  | 2.952 | 1.120934959 |
| 2.924           | 2.239 | 1.305940152 | 3.44   | 3.08  | 1.116883117 |
| 3.96            | 3.039 | 1.303060217 | 3.718  | 3.333 | 1.115511551 |
| 3.286           | 2.525 | 1.301386139 | 3.452  | 3.119 | 1.106764989 |
| 3.365           | 2.593 | 1.297724643 | 2.924  | 2.643 | 1.106318577 |
| 3.464           | 2.695 | 1.285343228 | 3.365  | 3.047 | 1.104364949 |
| 3.228           | 2.519 | 1.281460897 | 2.564  | 2.322 | 1.1042205   |
| 2.867           | 2.24  | 1.279910714 | 3.599  | 3.262 | 1.103310852 |
| 3.45            | 2.72  | 1.268382353 | 3.004  | 2.726 | 1.101980924 |
| 2.926           | 2.311 | 1.266118563 | 3.373  | 3.08  | 1.09512987  |
| 3.491           | 2.776 | 1.257564841 | 3.088  | 2.821 | 1.094647288 |
| 3.239           | 2.577 | 1.256887854 | 2.695  | 2.466 | 1.092862936 |
| 3.058           | 2.436 | 1.255336617 | 3.053  | 2.8   | 1.090357143 |
| 3.373           | 2.695 | 1.251576994 | 3.343  | 3.077 | 1.086447839 |
| 3.048           | 2.436 | 1.251231527 | 3.336  | 3.077 | 1.084172896 |
| 3.205           | 2.564 | 1.25        | 3.205  | 2.96  | 1.08277027  |
| 3.205           | 2.567 | 1.248539151 | 3.421  | 3.172 | 1.078499369 |
| 2.881           | 2.311 | 1.246646473 | 2.643  | 2.466 | 1.071776156 |
| 3.173           | 2.554 | 1.242364918 | 3.048  | 2.847 | 1.070600632 |
| 3.215           | 2.593 | 1.239876591 | 3.333  | 3.121 | 1.067926946 |
| 3.52            | 2.847 | 1.236389182 | 3.08   | 2.892 | 1.065006916 |
| 3.774           | 3.053 | 1.236161153 | 3.269  | 3.082 | 1.060674886 |
| 3.101           | 2.525 | 1.228118812 | 3.246  | 3.077 | 1.054923627 |
| 3.671           | 2.99  | 1.227759197 | 2.704  | 2.577 | 1.049282111 |

| Spore size (um) |                    |             |             |             |             |
|-----------------|--------------------|-------------|-------------|-------------|-------------|
| Length          | Width              | Ratio       | Length      | Width       | Ratio       |
| 3.004           | 2.449              | 1.226623111 | 3.246       | 3.101       | 1.04675911  |
| 3.018           | 2.466              | 1.223844282 | 3.073       | 2.949       | 1.042048152 |
| 3.45            | 2.823              | 1.222104145 | 2.8         | 2.72        | 1.029411765 |
| 3.269           | 2.692              | 1.214338782 | 2.838       | 2.762       | 1.027516293 |
| 3.592           | 2.96               | 1.213513514 | 3.269       | 3.185       | 1.026373626 |
| 2.924           | 2.419              | 1.208763952 | 3.026       | 2.952       | 1.025067751 |
| 3.494           | 2.901              | 1.204412272 | 3.098       | 3.039       | 1.019414281 |
| 2.867           | 2.395              | 1.197077244 | 3.13        | 3.088       | 1.013601036 |
| 3.119           | 2.615              | 1.192734226 | 3.08        | 3.047       | 1.010830325 |
| 3.208           | 2.695              | 1.190352505 | 2.952       | 2.926       | 1.008885851 |
| 3.537           | 2.974              | 1.18930733  | 3.166       | 3.166       | 1           |
| 3.488           | 2.96               | 1.178378378 | 2.692       | 2.692       | 1           |
|                 | Median             |             | 3.215       | 2.692       | 1.177686406 |
|                 | Average            |             | 3.210890909 | 2.693681818 | 1.201715563 |
|                 | Standard deviation |             | 0.28        | 0.30        | 0.13        |
|                 | Max                |             | 3.96        | 3.333       | 1.499791232 |
|                 | Min                |             | 2.564       | 2.114       | 1           |
